# Supplementary material
Source: publisher figshare collection journal article supplement (https://frontiersin.figshare.com/ndownloader/files/17795459)
Supplement: Supplementary file [file 17795459]

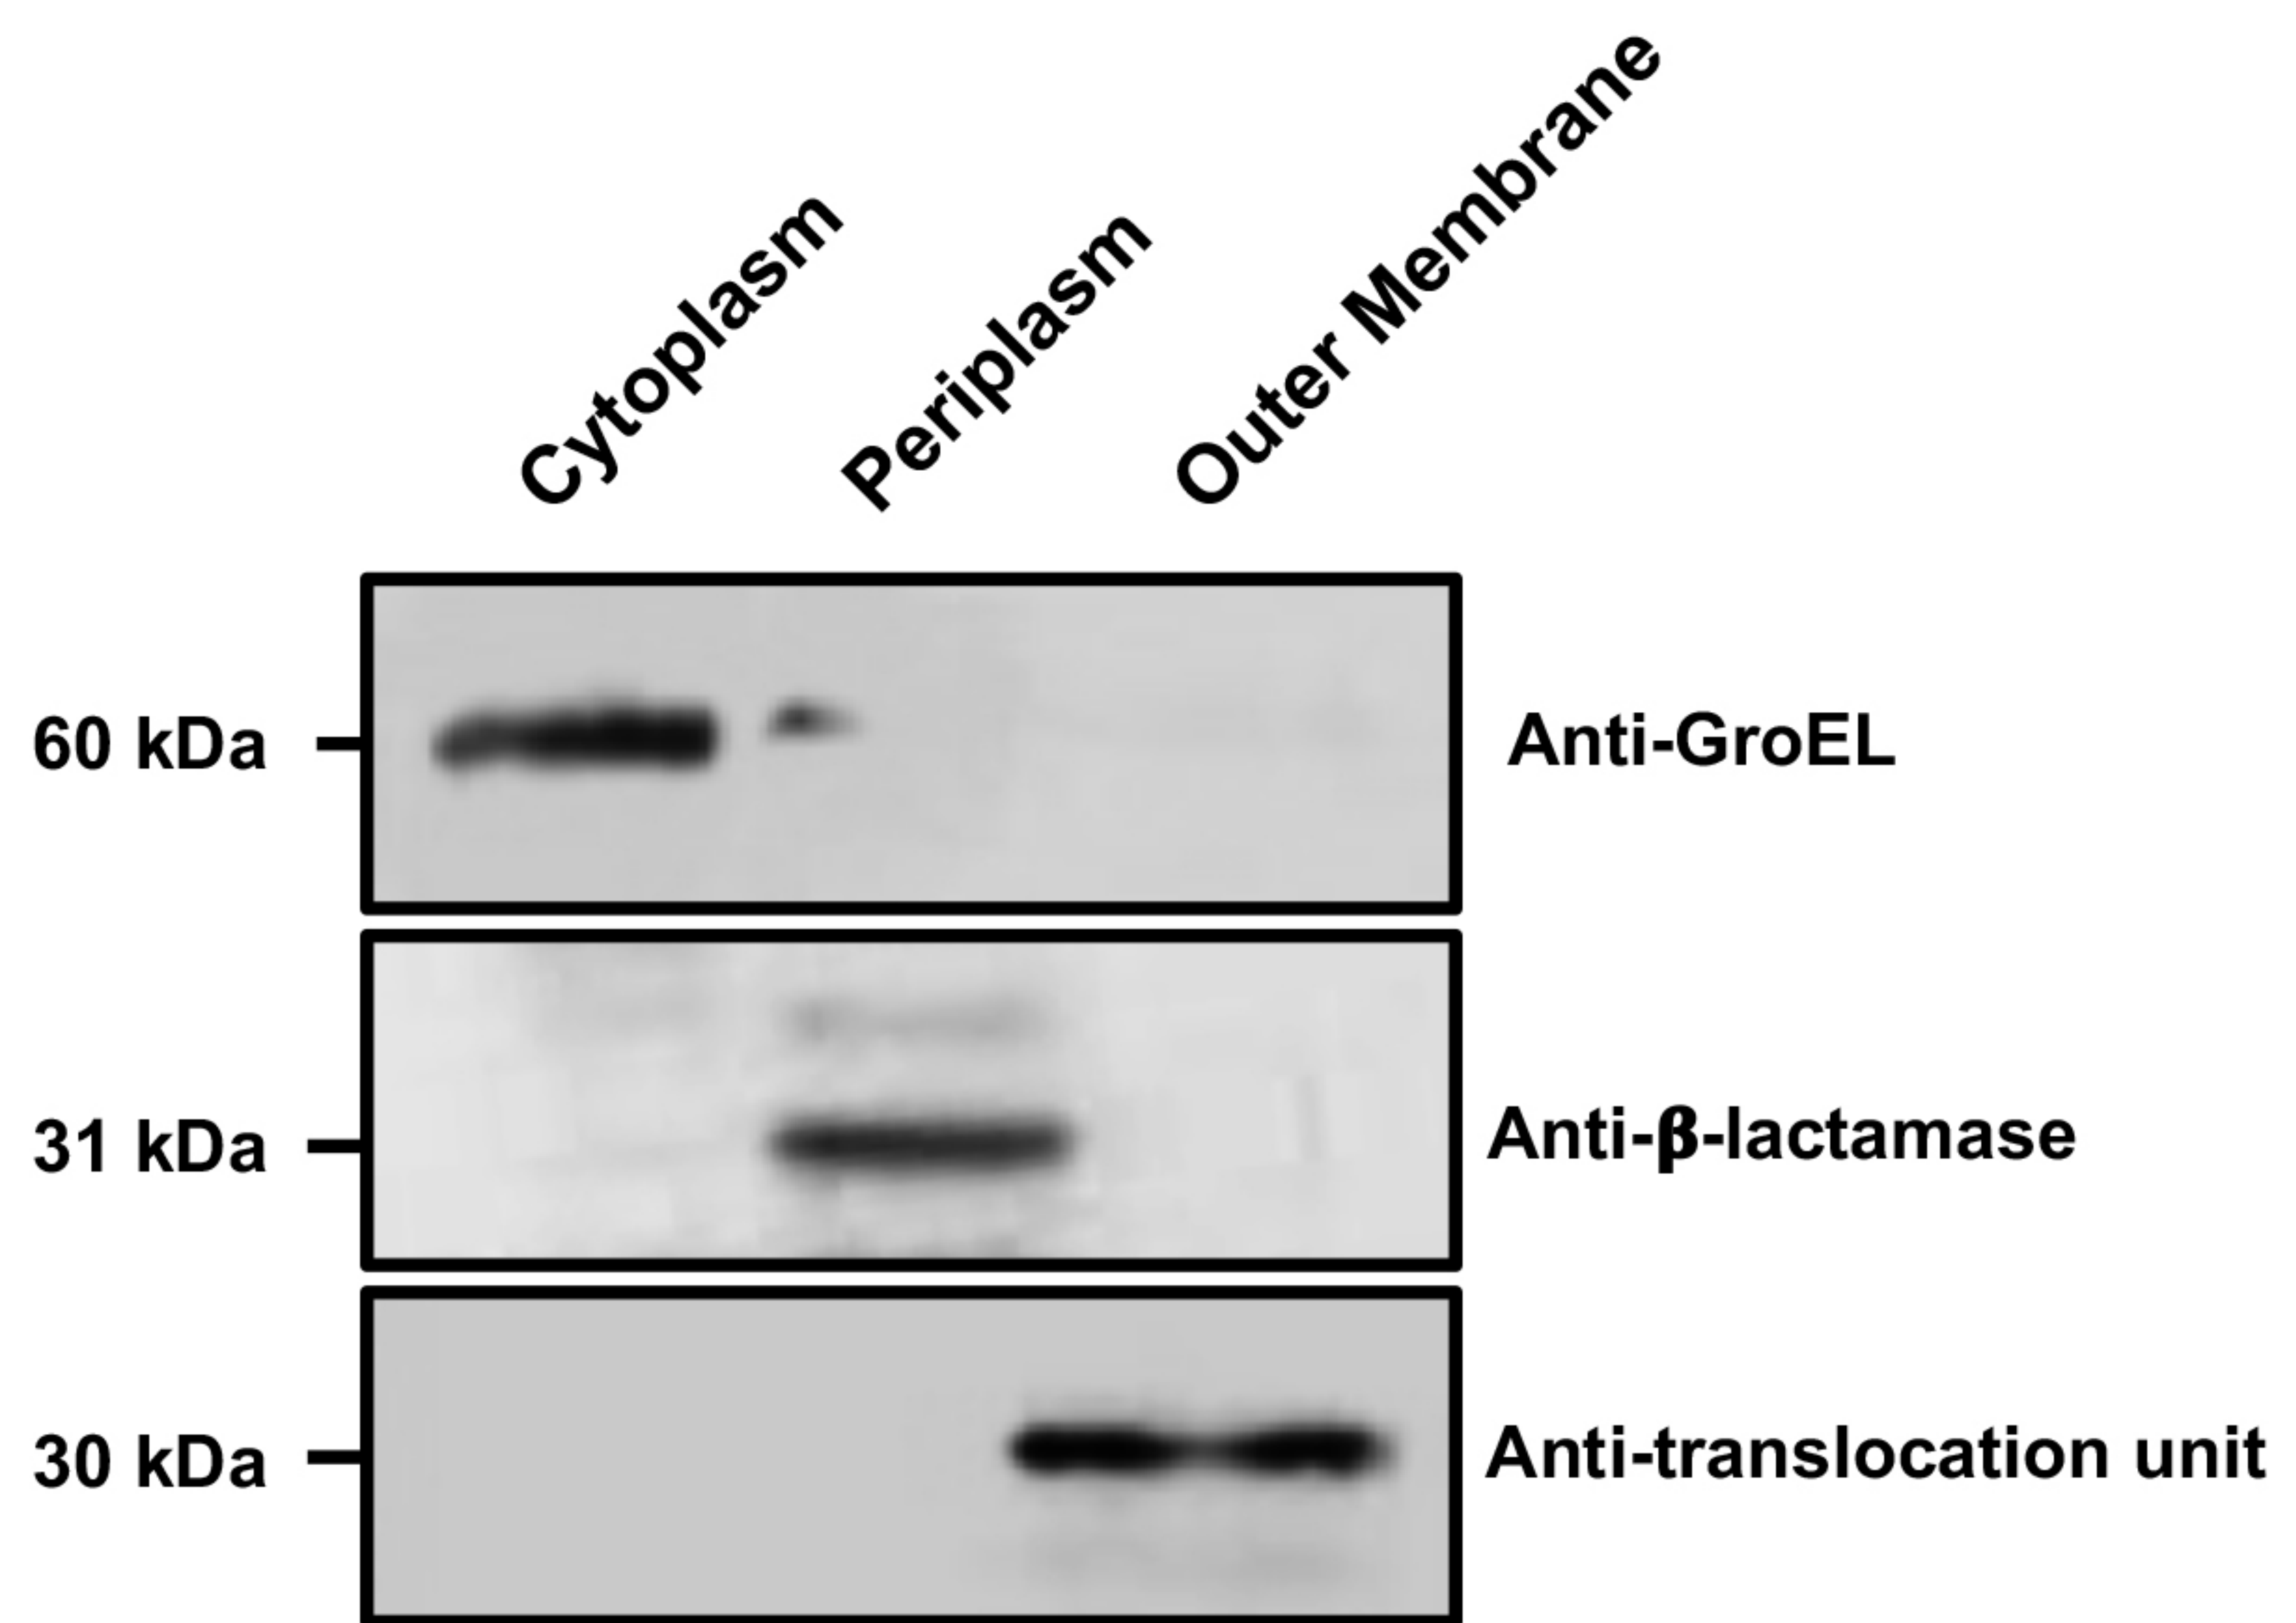

**Supplementary Fig. 1. Validation of bacterial membrane fractionation during infection.** Bacterial fractions extracted from EAEC were subjected to western analysis. Proteins from different fractions were analyzed using a specific primary antibody against GroEL (cytoplasmic fraction),  $\beta$ -lactamase (periplasmic fraction), and translocation unit ( $\beta$ -barrel) (outer membrane fraction), followed by an HRP-conjugated goat-anti rabbit IgG or an HRP-conjugated rabbit-anti mouse IgG2a secondary antibodies.

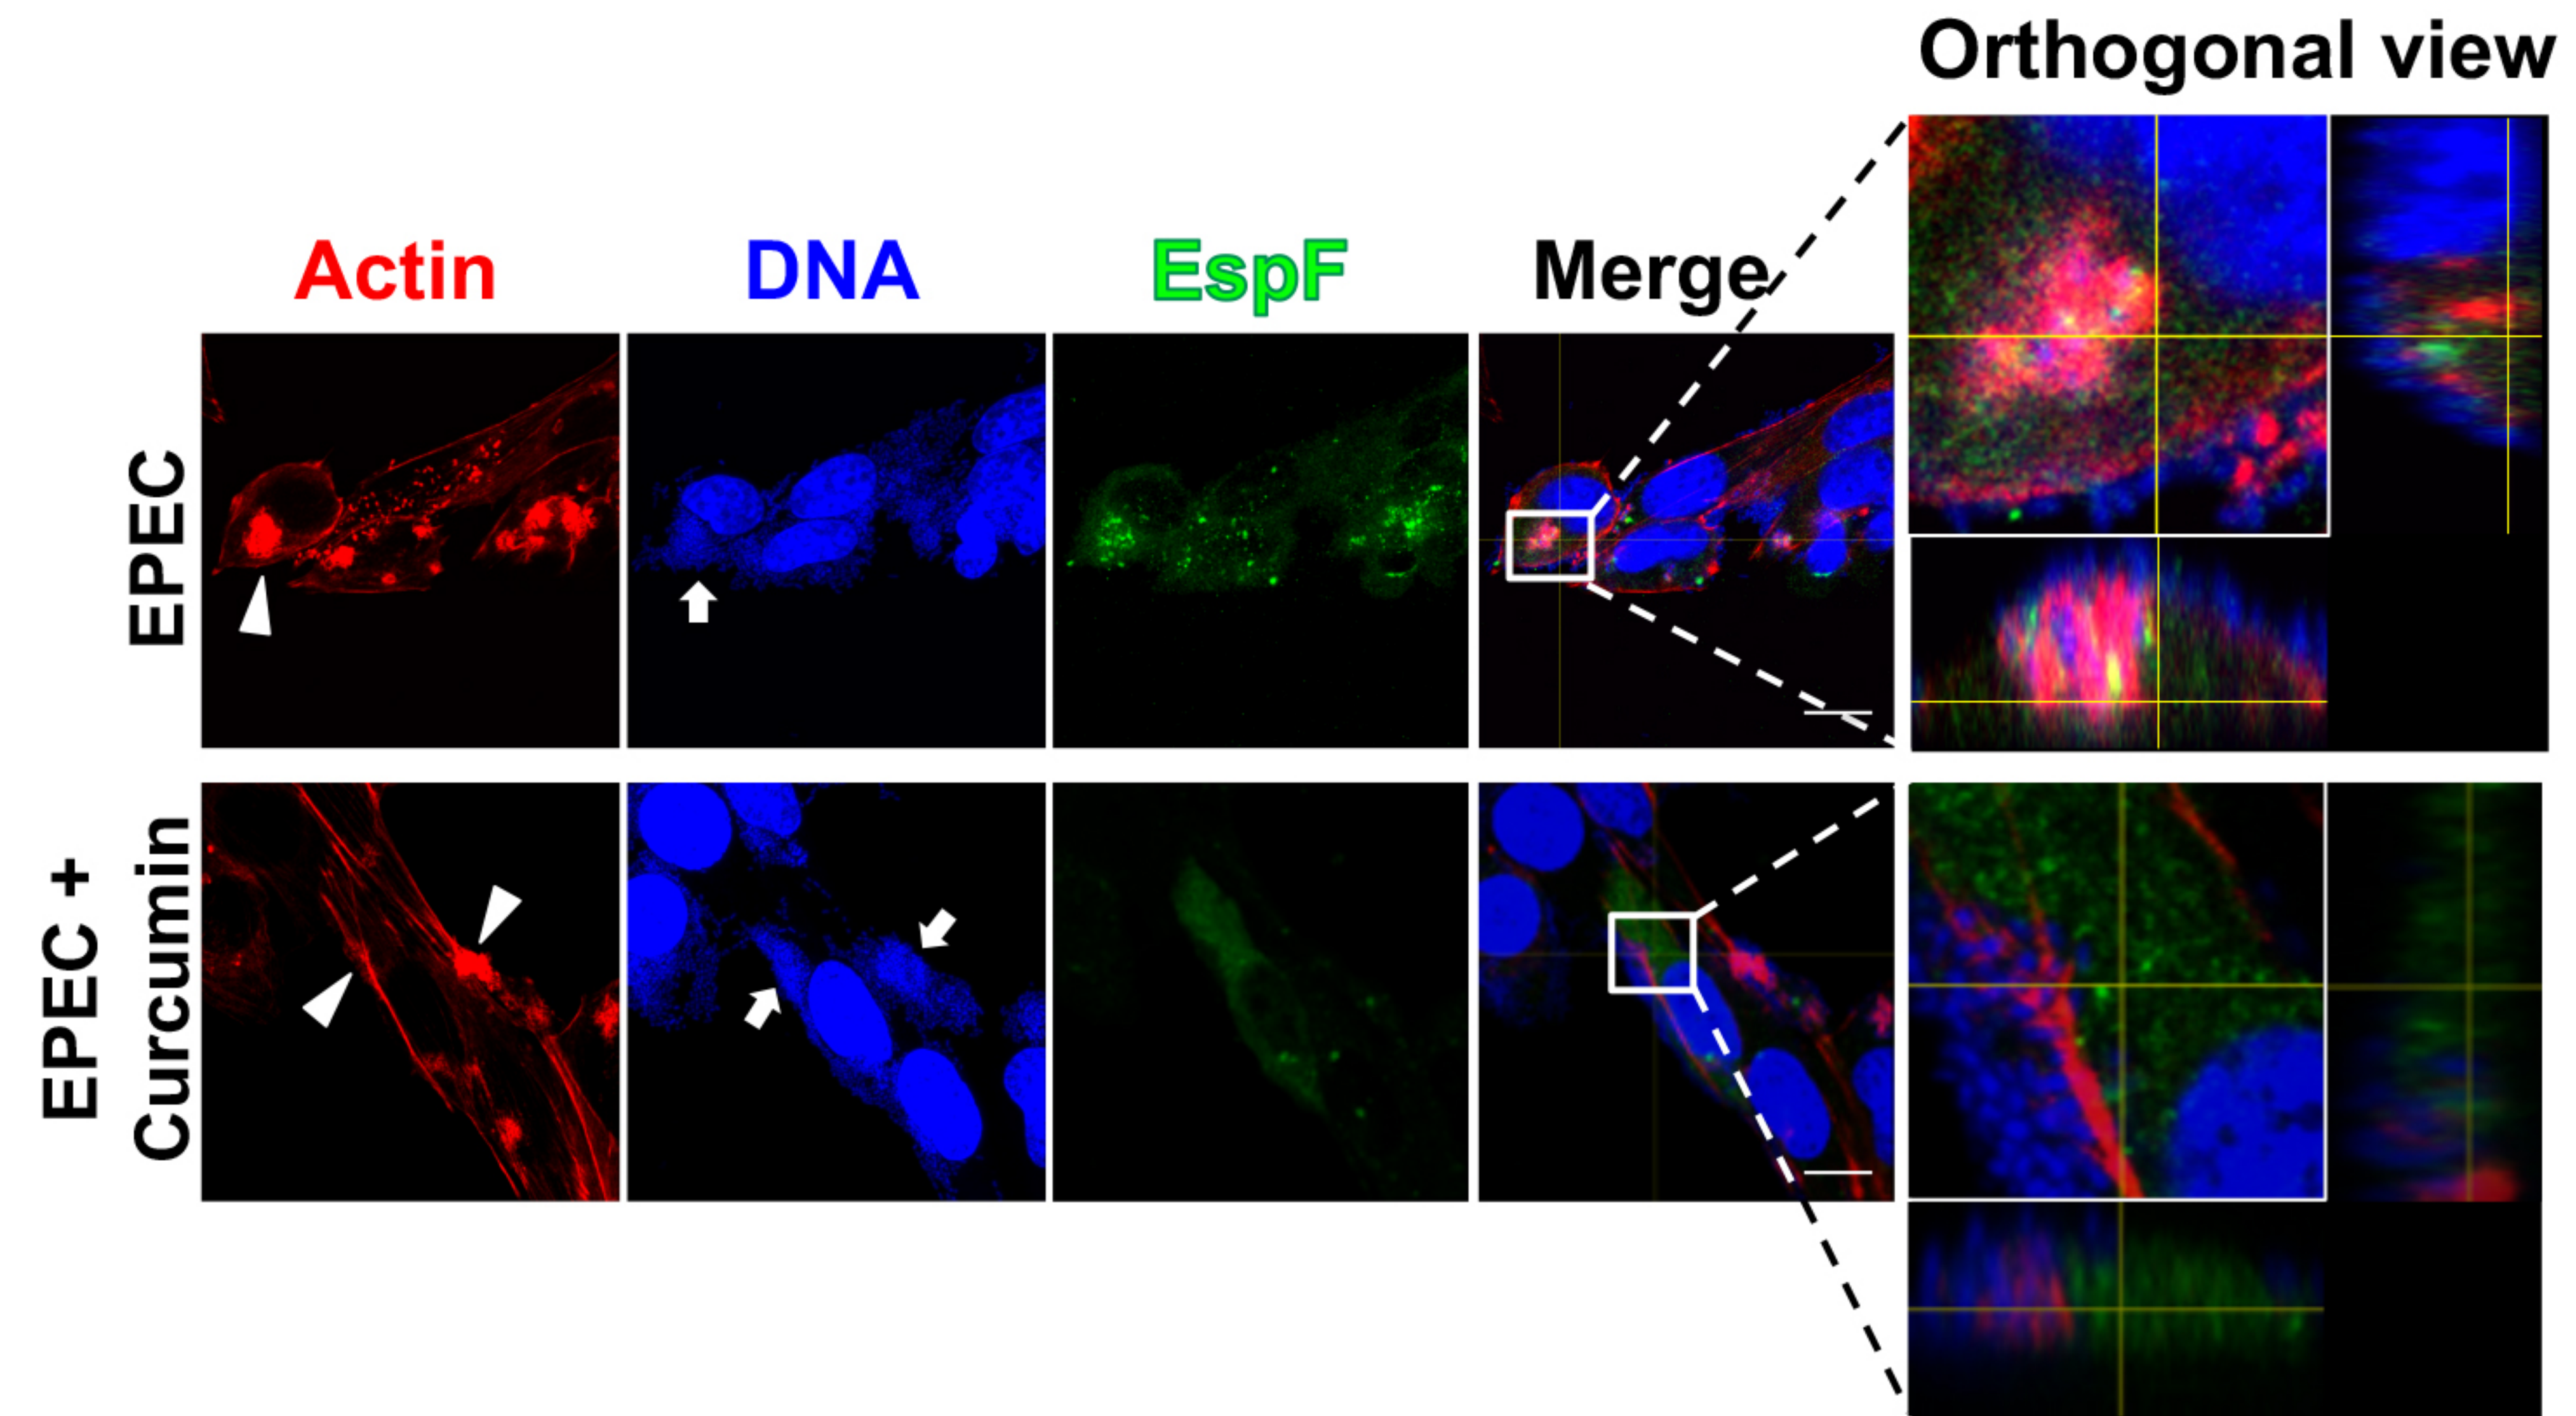

**Supplementary Fig. 2. Curcumin does not affect the translocation of EspF from EPEC during infection, through the T3SS in HEp-2 cells, and the formation of actin pedestals.** Confocal microscopy of HEp-2 cells infected with EPEC as described in Figure 5, but EspF internalization was detected by immunofluorescence with an anti-EspF antibodies followed by biotin-SP-conjugated goat-anti mouse IgG and DTAF-conjugated streptavidin. Scale bar 15  $\mu\text{m}$ .



**A**

Alignment sequence analysis of  $\beta$ -barrel domains of Pet and EspC to the  $\beta$ -barrel sequence of EspP.

|       | % Identity with respect to<br>EspP | % Similarity with respect to<br>EspP |
|-------|------------------------------------|--------------------------------------|
| Pet*  | 88                                 | 95                                   |
| EspC* | 81                                 | 92                                   |

\*  $\beta$ -barrel amino acid sequence domains were used in alignment analysis with respect to EspP

**B**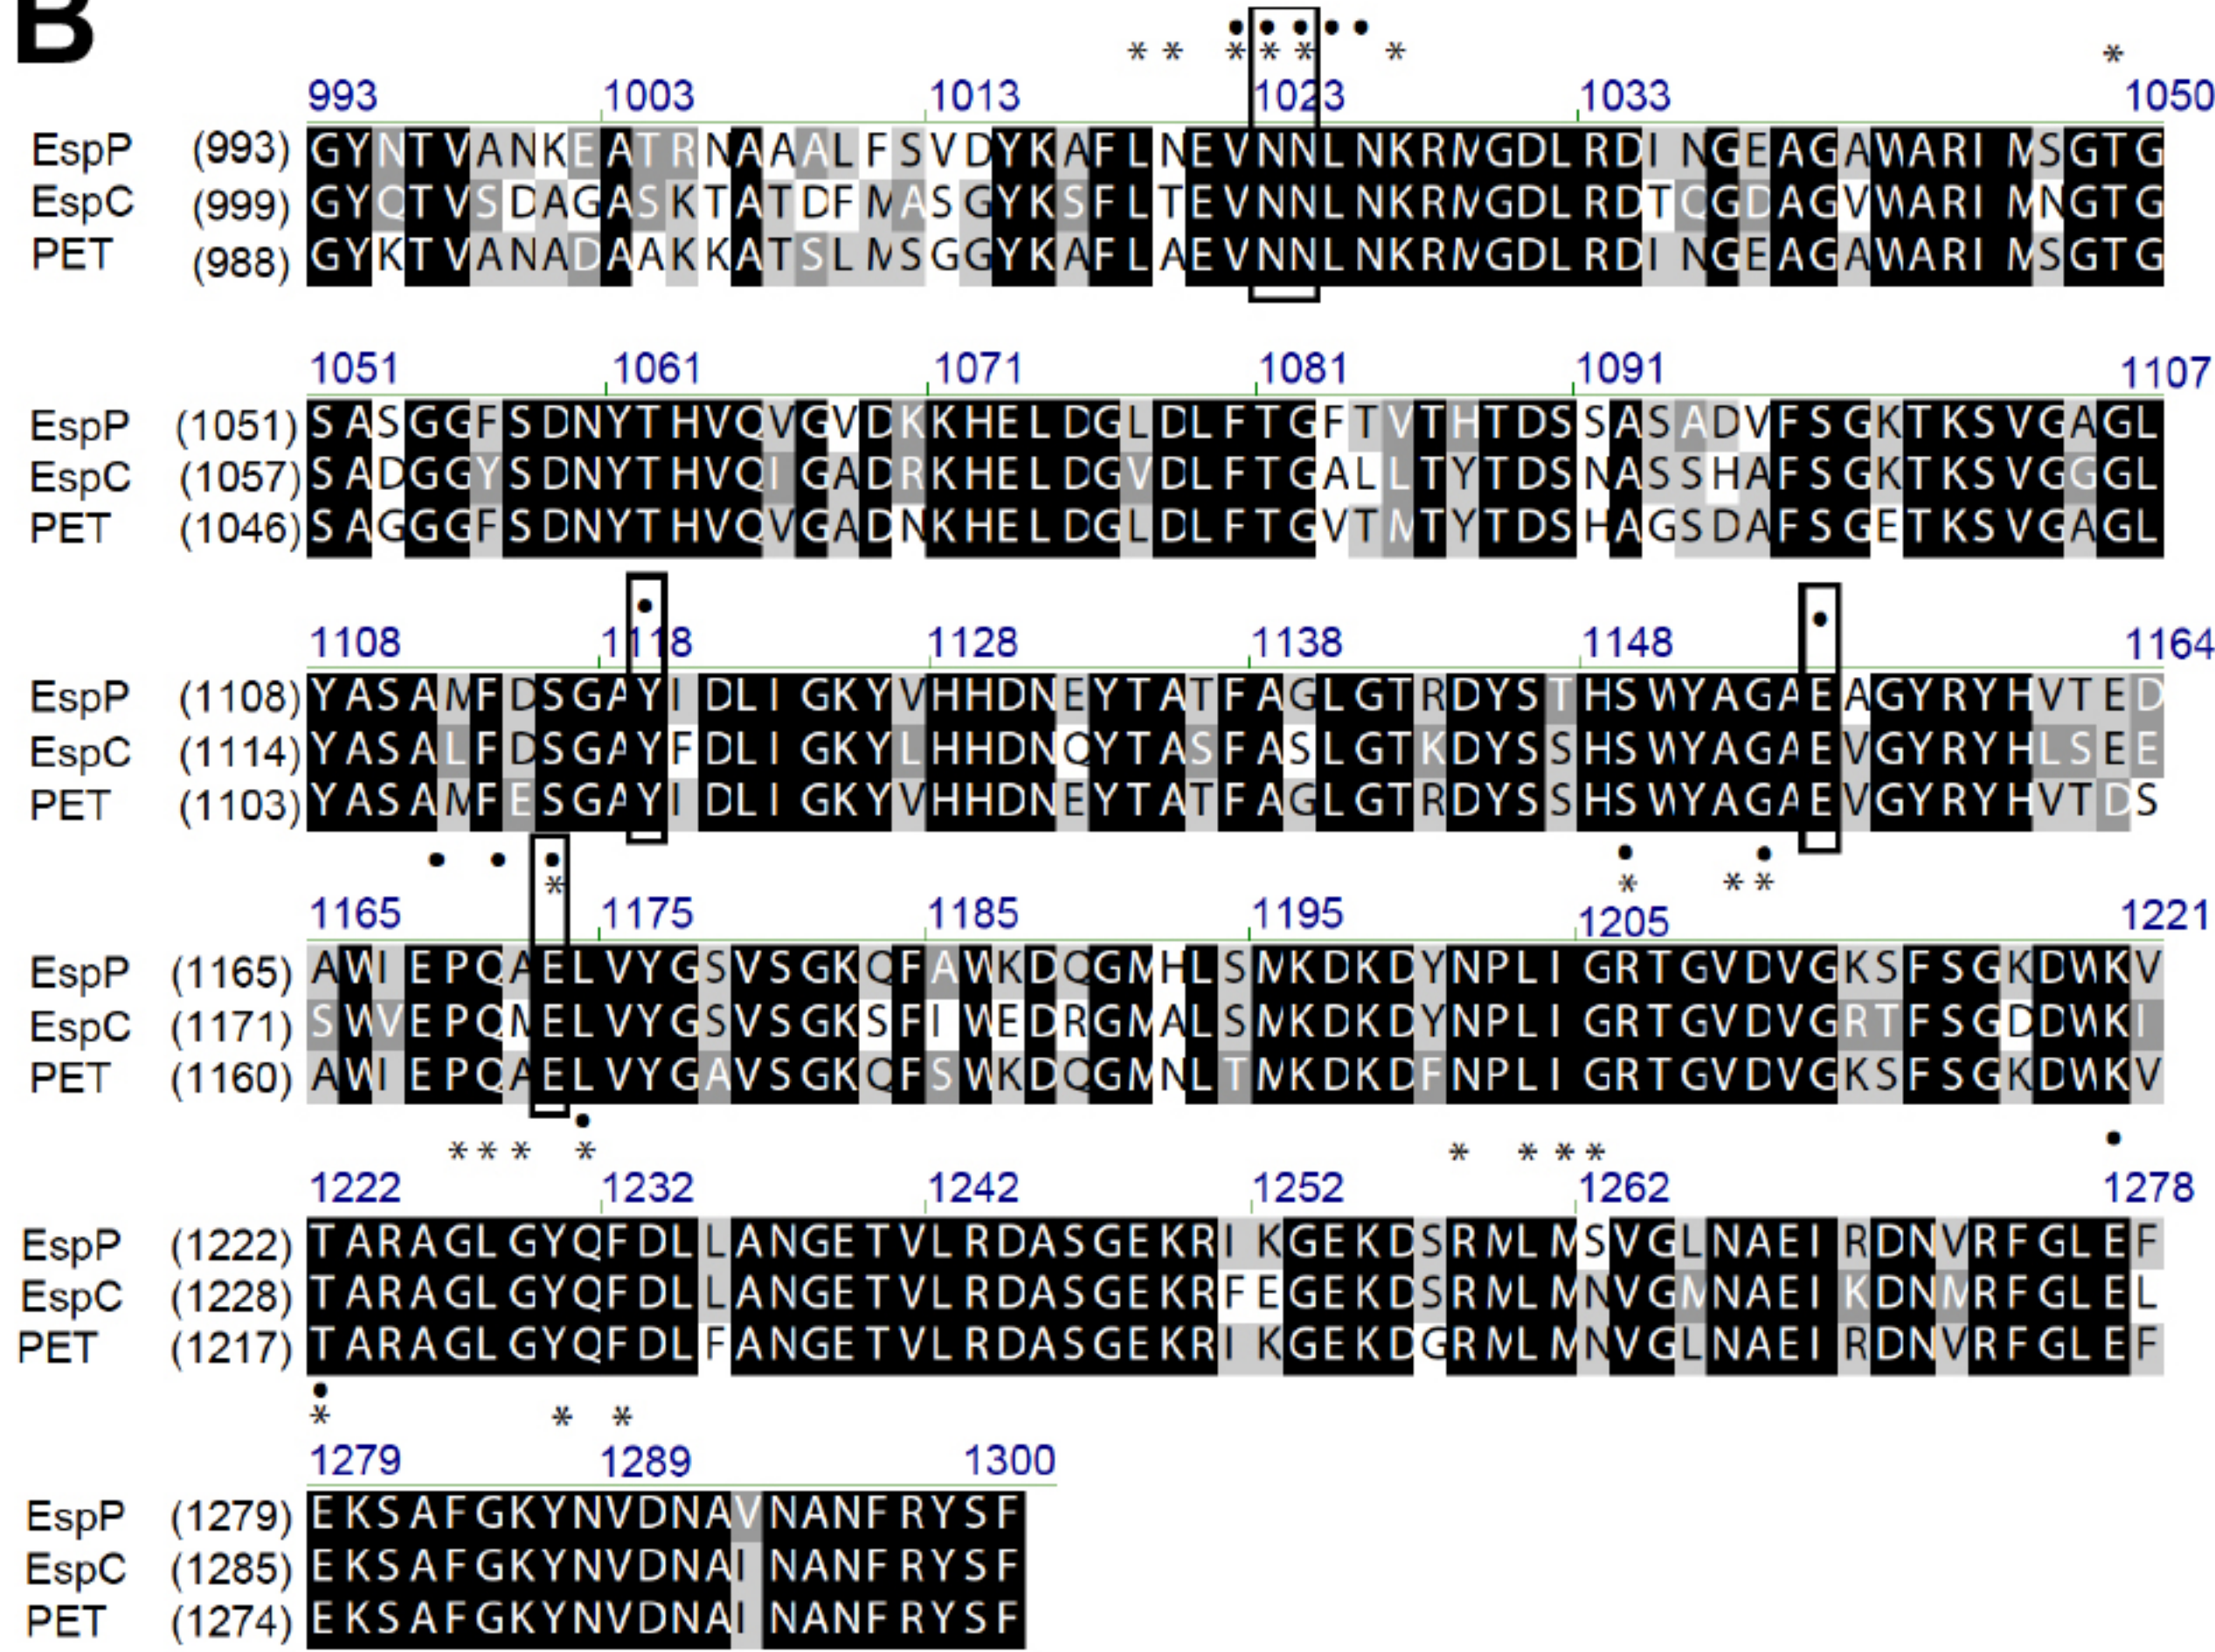

**Supplementary Fig. 3. Alignment of the Pet (GenBank accession no. SJK83553.1), EspC (GenBank accession no. AAC44731.1), and EspP (GenBank accession no. OSJ99441.1) translocation domains ( $\beta$ -barrels). Residues labeled with a circle (•) highlight the residues involved in curcumin binding with the EspC translocation domain ( $\beta$ -barrel). Asterisks (\*) labeled residues involved in curcumin binding with the Pet translocation domain ( $\beta$ -barrel), and box (□) denote residues involved in the active-site asparagine.**



# A

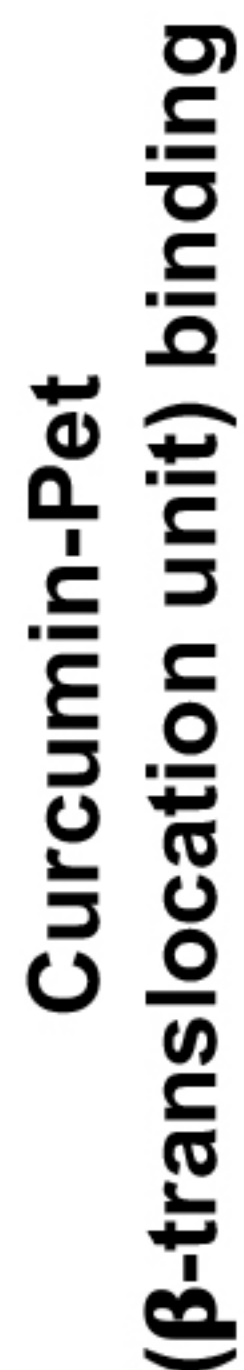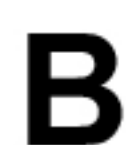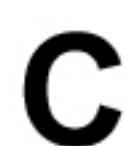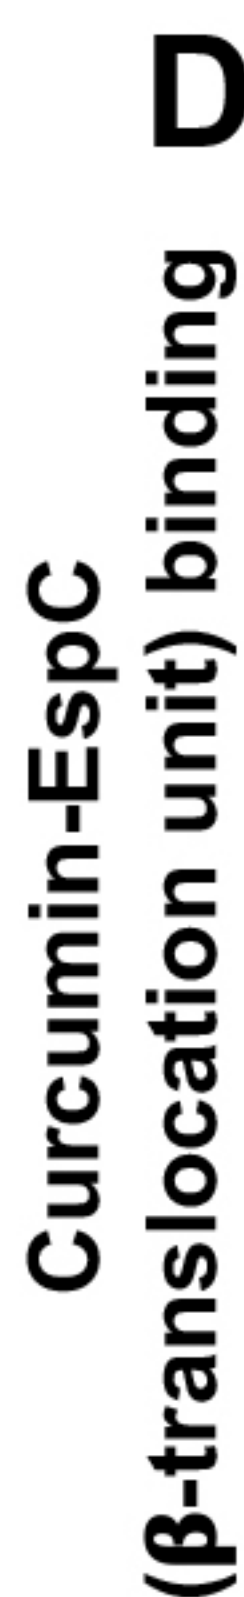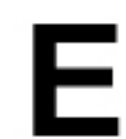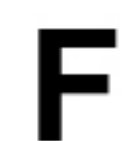

**Supplementary Fig. 4. Structural validation of theoretical 3D structure for Pet and EspC  $\beta$ -Domains.** Ramachandran plot analysis, 98% and 97.7% of total residues are in the most favored region for Pet and EspC, respectively (A, D). Normalized QMEAN6 scores (B, E), and Z-score diagrams of the individual components of QMEAN (C, F).

**Supplementary Table 1. Summary of docking score values (kcal/mol) per Pose and active residues**

| Pet            |                          |                                                                                                                                                                                              |
|----------------|--------------------------|----------------------------------------------------------------------------------------------------------------------------------------------------------------------------------------------|
| Cluster Number | Docking score (kcal/mol) | Amino Acids to 4 Å of curcumin                                                                                                                                                               |
| 1              | -7.82                    | L 1014, A1015, V1017, N1018, N1019, K1022, Y1055, E1167, R1200, V1203, D1204, G1221, L1222, G1223, Q1225, R1252, L1254, M1255, N1256, E1274, Y1281, V1283                                    |
| 1              | -7.71                    | K1011, A 1012, L 1014, A1015, V1017, N1018, N1019, K1022, D1051, D1053, Y1055, E1167, R1200, V1203, G1221, Q1225, R1252, L1254, M1255, N1256, E1274, Y1281, V1283                            |
| 1              | -7.59                    | K1011, A 1012, L 1014, A1015, V1017, N1018, N1019, D1053, Y1055, S1084, E1167, G1221, Q1225, R1252, L1254, M1255, N1256, E1274, Y1281, V1283                                                 |
| 1              | -7.57                    | L 1014, A1015, V1017, N1018, N1019, L1020, N1021, K1022, E1149, Y1055, Y1113, E1163, Q1165, E1167, R1200, R1219, G1221, L1222, G1223, Q1225, R1252, L1254, M1255, N1256, E1274, Y1281, V1283 |
| 1              | -6.69                    | L 1014, A1015, V1017, N1018, N1019, K1022, Y1055, E1167, R1200, G1221, L1222, L1254, M1255, N1256, E1274, Y1281, V1283                                                                       |
| 1              | -6.57                    | V1017, N1018, N1019, L1020, N1021, E1149, Y1055, Y1113, E1163, Q1165, E1167, R1200, R1219, G1221, L1222, G1223, Q1225, R1252, N1256, E1274, Y1281, V1283                                     |
| 2              | -5.11                    | A1036, W1237, A1038, R1039, I1040, V1058, V1060, G1061, A1289, N1290, F1291                                                                                                                  |
| 1              | -5.01                    | A1015, V1017, N1018, N1019, K1022, Y1055, E1167, R1200, G1221, L1222, L1254, M1255, N1256, E1274, Y1281, V1283                                                                               |
| 2              | -4.88                    | A1036, W1237, A1038, V1058, V1060, G1061, A1289, N1290, F1291                                                                                                                                |
| 2              | -4.08                    | W1237, A1038, R1039, I1040, V1058, V1060, G1061, A1289, N1290                                                                                                                                |
| EspC           |                          |                                                                                                                                                                                              |
| Cluster Number | Docking score (kcal/mol) | Amino Acids to 4 Å of curcumin                                                                                                                                                               |
| 1              | -9.32                    | V1028, N1029, N1030, L1031, N1032, Y1124, E1160, E1174, Q1176, E1178, R1211, D1215, R1230, Q1236, L1265, N1267, E1283, E1285                                                                 |
| 1              | -9.25                    | L1025, V1028, N1029, N1030, L1031, N1032, K1033, E1160, E1174, Q1176, E1178, R1211, V1214, D1215, G1232, L1233, G1234, Q1236, L1265, M1266, N1267, E1283, E1285, K1286                       |
| 1              | -7.79                    | N1029, N1030, L1031, N1032, K1033, G1036, D1037, L1118, E1160, R1164, E1174, Q1176, E1178, R1211, V1214, D1215, R1230, G1234, Q1236, L1265, M1266, N1267, E1283, E1285                       |
| 1              | -7.76                    | V1028, N1029, N1030, L1031, N1032, K1033, G1036, D1037, Y1124, E1160, R1164, E1174, Q1176, E1178, R1211, V1214, D1215, R1230, Q1236, L1265, M1266, N1267, E1283, E1285                       |
| 1              | -7.49                    | V1028, N1029, N1030, L1031, G1036, D1037, Y1124, E1160, R1164, E1174, Q1176, E1178, R1211, Q1236, L1265, M1266, N1267, E1283, E1285                                                          |
| 1              | -7.24                    | N1029, N1030, L1031, G1036, D1037, Y1124, E1160, R1164, E1174, Q1176, E1178, R1211, V1214, R1230, Q1236, M1266, N1267, E1283, E1285                                                          |
| 1              | -6.93                    | V1028, N1029, N1030, L1031, Y1124, E1160, E1174, Q1176, E1178, R1211, D1215, R1230, Q1236, N1267, E1283, E1285                                                                               |
| 1              | -5.64                    | N1030, L1031, N1032, K1033, G1036, D1037, L1118, E1160, R1164, E1174, Q1176, E1178, R1211, G1234, Q1236, M1266, N1267, E1283, E1285                                                          |
| 2              | -3.63                    | V1161, G1162, Y1163, P1175, Q1176, M1177, T1212, G1213, V1214, L1233, G1234, Y1235                                                                                                           |
| 2              | -3.10                    | V1161, G1162, Y1163, P1175, Q1176, M1177, T1212, G1213, V1214                                                                                                                                |
